# Supplementary material
Source: publisher figshare collection journal article supplement (https://karger.figshare.com/ndownloader/files/14629499)

**Lactose intolerance is one of the most common forms of food intolerance and is often confused with cow's milk allergy**

Lactose intolerance results from a reduced ability to digest lactose, the main digestible carbohydrate in mammalian milk. The fermentation of undigested lactose can lead to gastrointestinal symptoms similar to the symptoms of cow's milk allergy.

| Cow's milk allergy                                                                                                                               |                                                                                   | Lactose intolerance<br>(primary or adult type)                                                              |                                                                                                                                             |  |  |
|--------------------------------------------------------------------------------------------------------------------------------------------------|-----------------------------------------------------------------------------------|-------------------------------------------------------------------------------------------------------------|---------------------------------------------------------------------------------------------------------------------------------------------|--|--|
| 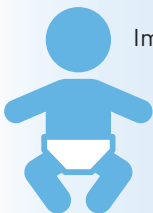 <p>Immune-mediated reaction</p>                                |  |  <p>Enzyme deficiency</p> |                                                          |  |  |
| <p>Peaks during the first year of life</p>                                                                                                       | <b>ONSET OF SYMPTOMS</b>                                                          | <p>Onset of symptoms: 5–6 years of age</p>                                                                  |                                                                                                                                             |  |  |
| <p>Tends to remit in childhood (2–5 years of age)</p>                                                                                            | <b>RESOLUTION</b>                                                                 |  <p>Irreversible</p>      |                                                                                                                                             |  |  |
| <p>Cow's milk proteins</p>                                      | <b>FOOD INVOLVED</b>                                                              |  <p>Lactose</p>           |                                                                                                                                             |  |  |
| <p>Angioedema of the lips, tongue, and palate; oral pruritus, nausea, abdominal pain, vomiting, diarrhea, blood and/or mucus in stool</p>        |                                                                                   | <b>GASTROINTESTINAL SYMPTOMS</b>                                                                            | <p>Abdominal pain, nausea, bloating, flatulence, diarrhea</p>                                                                               |  |  |
| <p>Skin (urticaria, angioedema); respiratory system (from nasal itching to shortness of breath); other (signs of anaphylaxis); atopic eczema</p> |                                                                                   | <b>EXTRAINTESTINAL SYMPTOMS</b>                                                                             | <p>Headache, vertigo, memory impairment, lethargy</p>  |  |  |
|  <p>Oral food challenge</p>                                   | <b>DIAGNOSTIC TEST</b>                                                            | <p>Lactose breath test</p>                                                                                  |                                                                                                                                             |  |  |
| <p>Diet free of cow's milk protein</p>                                                                                                           |                                                                                   | <b>DIETARY TREATMENT</b>                                                                                    | <p>Low-lactose diet</p>                                                                                                                     |  |  |

## When to restrict lactose

|                                                                                                                                                                  |                                                                                                                                              |                                                                                                                                                                |                                                                                                                                                                                     |
|------------------------------------------------------------------------------------------------------------------------------------------------------------------|----------------------------------------------------------------------------------------------------------------------------------------------|----------------------------------------------------------------------------------------------------------------------------------------------------------------|-------------------------------------------------------------------------------------------------------------------------------------------------------------------------------------|
| <b>Congenital lactase deficiency</b><br><i>Complete exclusion of lactose</i>  | <b>Primary lactose intolerance</b><br><i>Low lactose</i>  | <b>Secondary lactose intolerance</b><br><i>Low lactose (temporarily)</i>  | <b>Cow's milk allergy</b><br><i>No restriction (except in the case of severe enteropathy)</i>  |
|------------------------------------------------------------------------------------------------------------------------------------------------------------------|----------------------------------------------------------------------------------------------------------------------------------------------|----------------------------------------------------------------------------------------------------------------------------------------------------------------|-------------------------------------------------------------------------------------------------------------------------------------------------------------------------------------|

**Unnecessary elimination of lactose from the infant's diet is disadvantageous for the development of a healthy gut microbiome.**

**A better knowledge of the differences between lactose intolerance and cow's milk allergy can help limit misunderstandings in diagnosing and managing these conditions.**

### Lactose intolerance

Annals of  
**Nutrition & Metabolism**

Annals of Nutrition & Metabolism  
Vol. 73, Suppl. 4, 30–37, 2018

**NNI** Nestlé  
Nutrition  
Institute

Annales Nestlé  
Vol. 76, No. 3, 2018

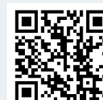

Supplement: Supplementary file 1 [file 14629499]
